# Supplementary material for: Highly efficient and bendable organic solar cells using a three-dimensional transparent conducting electrode
Source: Royal Society of Chemistry journal article supplement (doi:10.1039/c3nr06755f), 2014-01-01
Supplement: c3nr06755f1.pdf [file c3nr06755f1.pdf]

## Supplementary Information

### Highly efficient and bendable organic solar cells using a three-dimensional transparent conducting-electrode

*Wei Wang,<sup>a,b</sup> Tae-Sung Bae,<sup>c</sup> Yeon Hyun Park,<sup>b</sup> Dong Ho Kim,<sup>b</sup> Sunghun Lee,<sup>b</sup> Guanghui Min,<sup>a</sup> Gun-Hwan Lee,<sup>b</sup> Myung-Kwan Song,<sup>\*b</sup> and Jungheum Yun<sup>\*b</sup>*

<sup>a</sup>Key Laboratory for Liquid-Solid Structural Evolution and Processing of Materials, Shandong University, Jinan 250061, China.

<sup>b</sup>Surface Technology Division, Korea Institute of Materials Science, Changwon, Gyeongnam 641-831, Republic of Korea

<sup>c</sup>Jeonju Center, Korea Basic Science Institute, Jeonju, Jeonbuk 561-180, Republic of Korea.

\*correspondence to [jungheum@kims.re.kr](mailto:jungheum@kims.re.kr), [smk1017@kims.re.kr](mailto:smk1017@kims.re.kr)

**Fig. S1** Highly magnified FE-SEM images of PET surfaces after the pretreatment using Ar plasma for (a and b) 1 min and (c and d) 3 min. Images show (a and c) 30°-tilted views and (b and d) plane views.

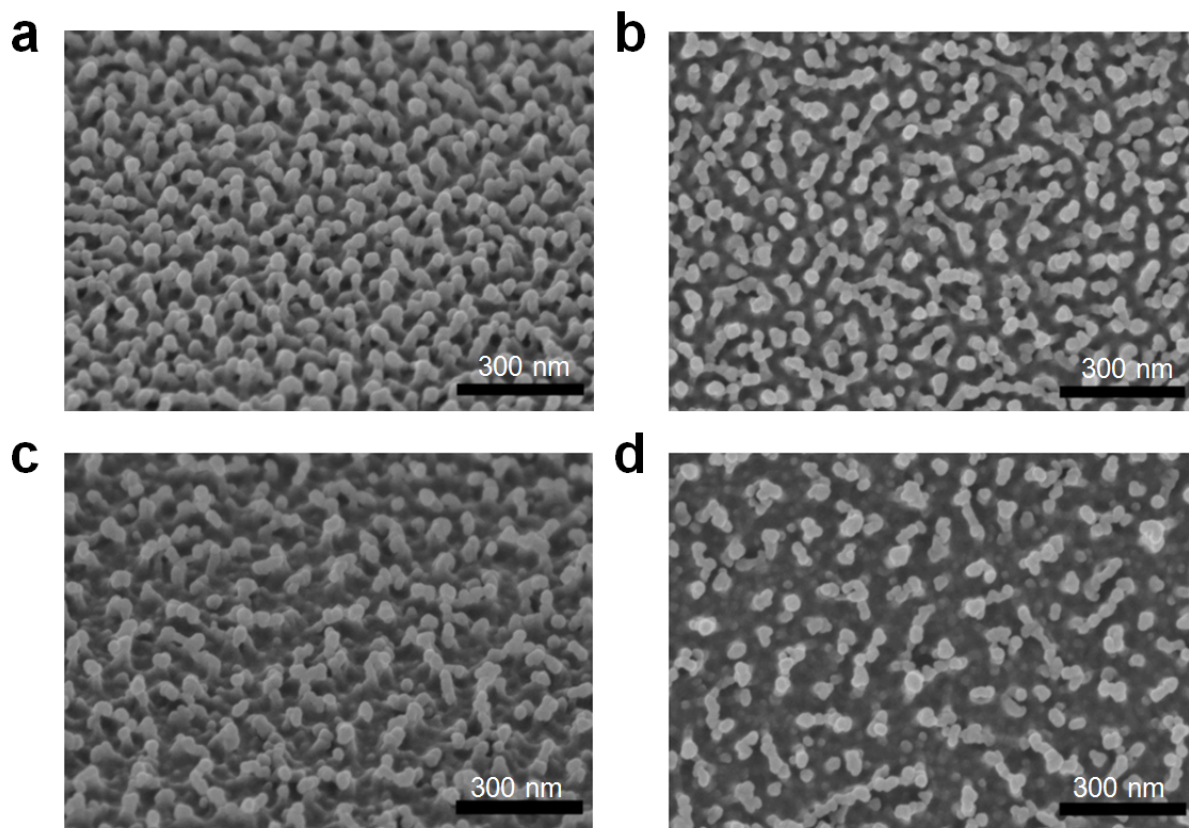

**Fig. S2** Relative concentrations of distinct phases in the layers determined by curve deconvolution of XPS Ag 3d<sub>5/2</sub> spectra.

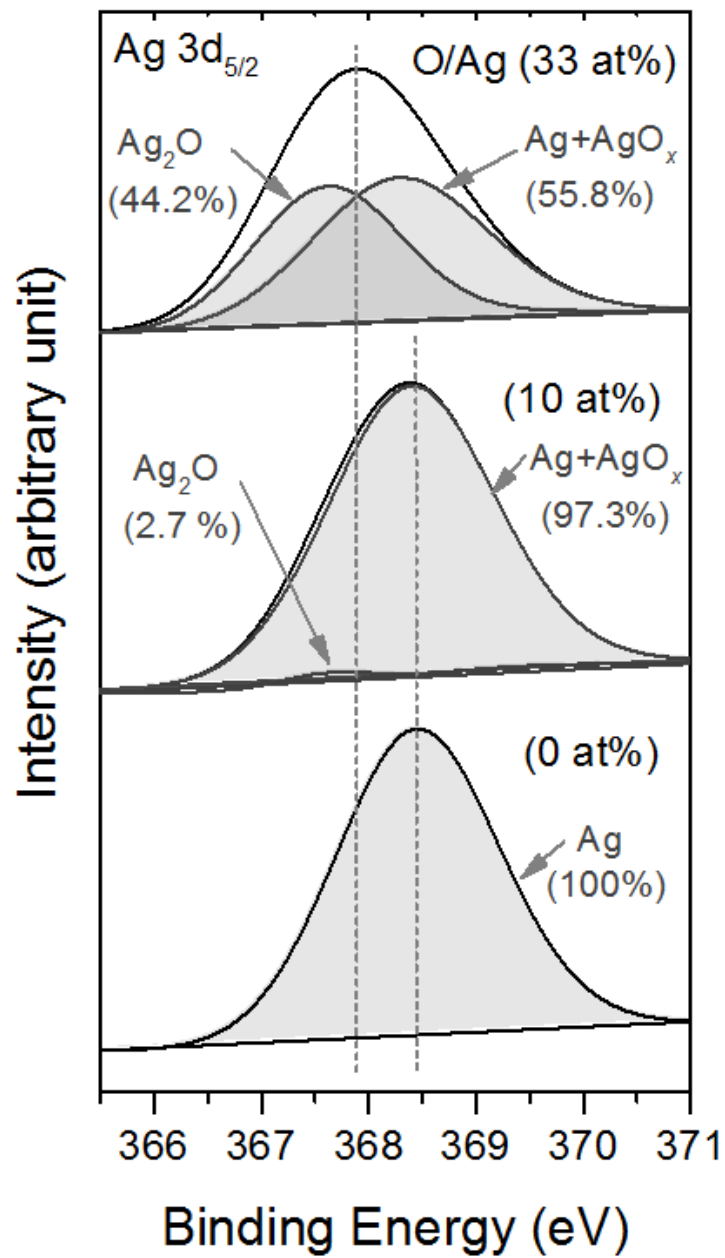

**Fig. S3** Refractive indices and extinction coefficients of the Ag and AgO<sub>x</sub> (O/Ag = 10 at%) layers.

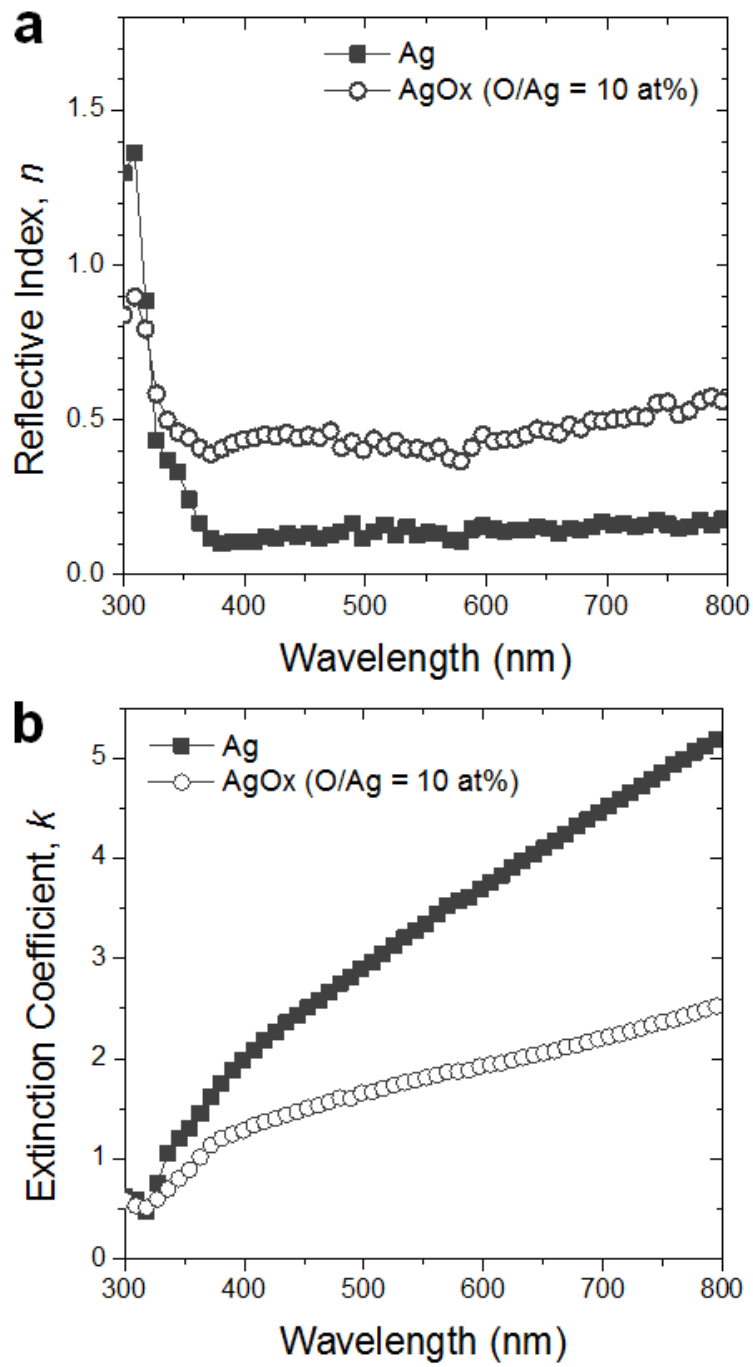

**Fig. S4** Changes in the specular reflections of the IAOI-NPA and IAI-NPA electrodes for different O/Ag atomic ratios and thicknesses of the  $\text{AgO}_x$  layer, which was sandwiched between the bottom and top ITO layers; these layers had nominal deposition thicknesses of 5 nm and 60 nm, respectively.

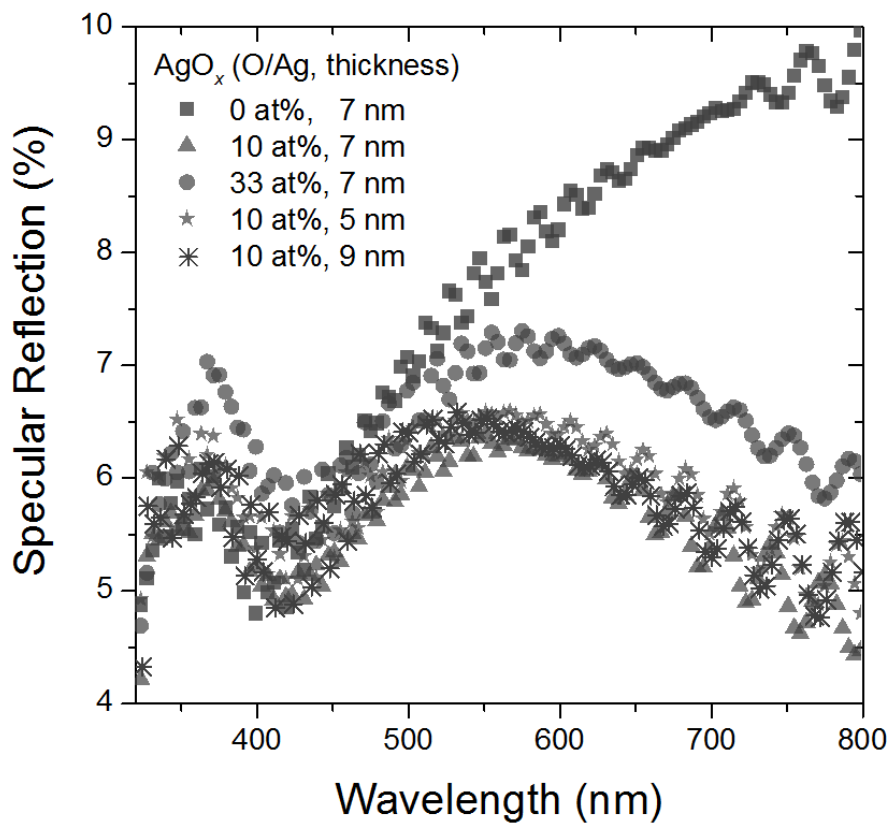

**Table S1.** Comparisons between the  $J_{sc}$  values determined from simulated AM 1.5G illuminations and the integrated  $J_{sc}$  values determined from IPCE spectra.

| Photoactive polymers          | Electrode        | $J_{sc}$<br>[mA cm <sup>-2</sup> ] | Integrated $J_{sc}$<br>[mA cm <sup>-2</sup> ] |
|-------------------------------|------------------|------------------------------------|-----------------------------------------------|
| PBDTTT-C: PC <sub>61</sub> BM | Planar ITO film  | 11.12 ± 0.39                       | 11.01 ± 0.15                                  |
|                               | IAOI-NPA (3 min) | 11.72 ± 0.13                       | 11.12 ± 0.21                                  |
|                               | IAOI-NPA (7 min) | 10.91 ± 0.29                       | 10.45 ± 0.35                                  |
| PTB-7: PC <sub>71</sub> BM    | Planar ITO film  | 13.73 ± 0.10                       | 13.31 ± 0.21                                  |
|                               | IAOI-NPA (3 min) | 14.58 ± 0.17                       | 14.04 ± 0.11                                  |
|                               | IAOI-NPA (7 min) | 13.07 ± 0.66                       | 12.81 ± 0.38                                  |
